## Development and implementation of a customised rapid syndromic diagnostic test for severe pneumonia

Vilas Navapurkar <sup>§1</sup>, Josefin Bartholdson Scott <sup>§2</sup>, Mailis Maes <sup>2</sup>, Thomas P Hellyer <sup>3,4</sup>, Ellen Higginson <sup>2</sup>, Sally Forrest <sup>2</sup>, Joana Pereira-Dias <sup>2</sup>, Surendra Parmar <sup>5</sup>, Emma Heasman-Hunt <sup>5</sup>, Petra Polgarova <sup>1</sup>, Jo Brown <sup>1</sup>, Lissamma Titti <sup>1</sup>, William PW Smith <sup>6</sup>, Jonathan Scott <sup>3</sup>, Anthony Rostron <sup>3</sup>, Matthew Routledge <sup>5,7</sup>, David Sapsford <sup>8</sup>, M.Estée Török <sup>9,10</sup>, Ronan McMullan <sup>11</sup> David A Enoch <sup>5</sup>, Vanessa Wong <sup>5,7</sup>, The VAPrapid investigators, Martin D Curran <sup>5</sup>, Nicholas M Brown <sup>5</sup> A John Simpson <sup>3,4</sup>, Jurgen Herre <sup>12</sup>, Gordon Dougan <sup>2</sup>, Andrew Conway Morris <sup>1,13\*</sup>

1. John V Farman Intensive Care Unit, Addenbrooke's Hospital, Cambridge, United Kingdom
2. Cambridge Institute of Therapeutic Immunology & Infectious Disease, Department of Medicine, University of Cambridge, Cambridge, United Kingdom
3. Translational and Clinical Research Institute, Newcastle University, United Kingdom
4. Newcastle upon Tyne Hospitals NHS Foundation Trust, Newcastle, United Kingdom
5. Clinical Microbiology and Public Health Laboratory, Public Health England, Cambridge, United Kingdom
6. Clinical School, University of Cambridge, Cambridge, United Kingdom
7. Infectious Diseases, Addenbrooke's Hospital, Cambridge, United Kingdom
8. Pharmacy Department, Addenbrooke's Hospital, Cambridge, United Kingdom
9. Department of Medicine, University of Cambridge
10. Department of Microbiology, Cambridge University Hospitals NHS Foundation Trust, United Kingdom
11. Wellcome-Wolfson Institute for Experimental Medicine, Queen's University Belfast, United Kingdom
12. Respiratory Medicine, Addenbrooke's Hospital, Cambridge, United Kingdom
13. Division of Anaesthesia, Department of Medicine, University of Cambridge, Cambridge, United Kingdom

<sup>§</sup>The identified authors contributed equally to the manuscript.

\*Address for correspondence

Andrew Conway Morris  
Division of Anaesthesia  
Department of Medicine  
Level 4, Addenbrooke's Hospital  
Hills Road  
Cambridge  
CB2 0QQ  
Email: [ac926@cam.ac.uk](mailto:ac926@cam.ac.uk)  
Phone: +44 (0)1223 217889

Word count: abstract 257, manuscript 2998

Running title: Rapid molecular diagnostic in severe pneumonia

## Declarations

**Ethical approval and consent to participate:** Written informed consent was obtained from patients or their proxy decision maker for studies where samples were obtained, where participants regained capacity retrospective consent was sought. The samples for the retrospective study were obtained from the VAPrapid study (ref 15) which was approved by the England and Northern Ireland (13/LO/065) and Scotland (13/SS/0074) National Research Ethics Service committees and sponsored by Newcastle upon Tyne Hospitals NHS Foundation Trust.

The prospective study was approved by the Leeds East Research Ethics Committee (17/YH/0286) Cambridge University Hospitals NHS Foundation Trust was the sponsor.

The assessment of routinely collected data from the comparator group received a consent waiver and was conducted under a protocol approved by the institutional review board (A095506).

**Consent for publication:** no individual patient data presented, not required

**Availability of data:** Microbial sequencing data is available from European Nucleotide Archive (ENA) with study accession numbers ERP111277, ERP111280, ERP112277, and ERP018622. Patient data is not publicly available for confidentiality reasons, but anonymised data can be obtained through contact with the corresponding author, subject to appropriate data sharing agreements being in place.

**Competing interests:** MDC is the inventor on a patent held by the Secretary of State for Health (UK Government) EP2788503, which covers some of the genetic sequences used in this study. VN is a founder, Director and shareholder in Cambridge Infection Diagnostics Ltd (CID Ltd) which is a commercial company aimed at developing molecular diagnostics in infection and antimicrobial and AMR stewardship. NMB, GD and ACM are members of the Scientific Advisory Board of Cambridge Infection Diagnostics Ltd (CID Ltd). All other authors declare no conflict of interest.

## Funding

The study was funded by Addenbrooke's Charitable Trust and the NIHR Cambridge Biomedical Resource Centre (Grant 18135 to Professor Dougan). Dr Török is supported by a Clinician Scientist Fellowship (funded by the Academy of Medical Sciences and the Health Foundation) and by the NIHR Biomedical Research Centre. Dr Conway Morris was supported by a Clinical Research Career Development Fellowship from the Wellcome Trust at the time of the work (WT 2055214/Z/16/Z) and is currently supported by an MRC Clinician Scientist Fellowship (MR/V006118/1). The metagenomic sequencing was funded by the Wellcome Trust. VAPrapid was funded Health Innovation Challenge Fund(HICF-510-078;094949/Z/10/X), a parallel funding partnership between the UK Department of Health and Wellcome Trust. Professor Simpson is a National Institute for Health Research (NIHR) Senior Investigator. The views expressed in this publication are those of the authors and not necessarily those of the UK Department of Health or Wellcome Trust. The funders had no role in the analysis of data or decision to publish. The corresponding author had full access to all the data in the study and had final responsibility for the decision to submit for publication.

## Acknowledgements

The VAPrapid investigators are Prof DF McAuley, Prof TS Walsh, Dr N Anderson, Dr S Singh, Prof P Dark, Dr A Roy, Prof GD Perkins, Ms L Emerson, Prof B Blackwood, Dr SE Wright, D K Kefala, Prof CM O’Kane, Dr SV Baudouin, Dr RL Patterson, Dr A Agus, Dr J Bannard-Smith, Dr NM Robbin, Prof ID Welters, Dr C Bassford, Dr B Yates, Dr C Spencer, Dr SK Laha, Dr J Hulme, Prof S Bonner, Dr V Linnett, Dr J Sonsken, Dr Van Den Broeck, Dr G Boschman, Mr DWJ Kennan, Dr AJ Allan, Mr G Phair, Ms J Parker and Dr SA Bowett.

The authors thank the consultant intensivists of the John V Farman Intensive Care Unit, Drs P Bradley, P Featherstone, S Ford, M Georgieva, A Johnston, R Mahroof, J Martin, J Preller, K Patel, C Summers, M Trivedi, J Varley, Pharmacist L Radford, the nursing and physiotherapy teams who managed the patients, and the patients and their families who consented to the study. We also thank Torsten Seemann for access to his Kraken database.

**Keywords:** Antimicrobial stewardship ,Critical Care, Molecular pathology, Pneumonia

## Contribution (CReDIT)

VN -Conceptualisation, resources, investigation, writing-review and editing, project administration, funding acquisition, supervision.

JBS -resources, investigation, data curation, formal analysis, writing-original draft.

MM-resources, investigation, writing-review and editing.

TH-resources, investigation, writing-review and editing

EH-investigation, writing-review and editing.

SF-investigation, writing-review and editing.

JD-investigation, writing-review and editing.

SP-investigation, writing-review and editing.

EHH-investigation, writing-review and editing.

PP-investigation, data curation writing-review and editing.

JB-investigation, data curation writing-review and editing.

LT-investigation, data curation writing-review and editing.

WS- data curation writing-review and editing

JS- resources, investigation, writing-review and editing

AR- resources, investigation, writing-review and editing

MR-data curation writing-review and editing.

DS-data curation writing-review and editing.

MET-conceptualisation, investigation, data curation writing-review and editing

DE-investigation, writing-review and editing.

VW-formal analysis, investigation, data curation writing-review and editing.

MDC-Conceptualisation, resources, investigation, writing-review and editing, project administration, funding acquisition, supervision.

NB-Conceptualisation, resources, investigation, writing-review and editing, project administration, supervision.

AJS- resources, investigation, writing-review and editing

JH-Conceptualisation, resources, investigation, writing-review and editing.

GD-Conceptualisation, resources, investigation, writing-review and editing, project administration, funding acquisition, supervision.

ACM-Conceptualisation, methodology, resources, investigation, writing-original draft, project administration, formal analysis, funding acquisition, supervision.

## **Abstract**

### **Background**

Microbial cultures for the diagnosis of pneumonia take several days to return a result, and are frequently negative, compromising antimicrobial stewardship. The objective of this study was to establish the performance of a syndromic molecular diagnostic approach, using a custom TaqMan array card (TAC) covering 52 respiratory pathogens, and assess its impact on antimicrobial prescribing.

### **Methods**

The TAC was validated against a retrospective multi-centre cohort of broncho-alveolar lavage samples. The TAC was assessed prospectively in patients undergoing investigation for suspected pneumonia, with a comparator cohort formed of patients investigated when the TAC laboratory team were unavailable.

Co-primary outcomes were sensitivity compared to conventional microbiology and, for the prospective study, time to result. Metagenomic sequencing was performed to validate findings in prospective samples. Antibiotic free days (AFD) were compared between the study cohort and comparator group.

### **Results**

128 stored samples were tested, with sensitivity of 97% (95% CI 88-100%). Prospectively 95 patients were tested by TAC, with 71 forming the comparator group. TAC returned results 51 hours (IQR 41-69 hours) faster than culture and with sensitivity of 92% (95% CI 83-98%) compared to conventional microbiology. 94% of organisms identified by sequencing were detected by TAC. There was a significant difference in the distribution of AFDs with more AFDs in the TAC group ( $p=0.02$ ). TAC group were more likely to experience antimicrobial de-escalation (OR 2.9 (95% 1.5-5.5)).

### **Conclusions**

Implementation of a syndromic molecular diagnostic approach to pneumonia led to faster results, with high sensitivity and impact on antibiotic prescribing.

**Trial registration:** The prospective study was registered with [clinicaltrials.gov](https://clinicaltrials.gov) NCT03996330

## 1 **Introduction**

2 For many decades the diagnosis of infectious diseases has relied on a combination of clinical  
3 assessment and microbiological culture. However, cultures are frequently negative <sup>1,2</sup> and  
4 can take several days to return a result.<sup>3</sup> Optimising antimicrobial therapy can be challenging,  
5 especially in patients who are at risk of multidrug resistant organisms.<sup>2</sup> In critically ill  
6 patients, this frequently results in the empiric use of broad-spectrum agents, with predictable  
7 consequences for antimicrobial resistance and other forms of antimicrobial-related harm.<sup>4</sup>  
8 Conversely, failure to identify the causative organism can lead to inappropriate antimicrobial  
9 therapy, which is associated with poor outcomes.<sup>5</sup>

10

11 Pneumonia amongst intubated and mechanically ventilated, critically ill patients can be  
12 especially difficult to diagnose.<sup>6</sup> Most critically ill patients are systemically inflamed,<sup>7</sup>  
13 clinical examination is unreliable<sup>8</sup> and there are multiple causes of radiographic lung  
14 infiltrates most of which are non-infectious.<sup>9,10</sup>

15

16 The development of host-based biomarkers for infection, such as C-reactive protein,<sup>11</sup>  
17 procalcitonin,<sup>12</sup> and alveolar cytokine concentrations<sup>13</sup> have been advanced as useful  
18 measures to help rationalise antimicrobial use. However, their utility in the diagnosis<sup>11,12</sup> and  
19 antimicrobial stewardship<sup>14,15</sup> of pneumonia has been challenged.

20

21 There is, therefore, a pressing need for rapid, sensitive, multi-pathogen-focussed diagnostic  
22 tests for pneumonia<sup>16</sup>. TaqMan array cards (TAC) enable the conduct of multiple  
23 simultaneous single-plex real-time polymerase chain reaction (RT-PCR), with this format  
24 allowing rapid and straightforward customisation. Although TACs have shown promising  
25 performance relative to conventional microbiology,<sup>17</sup> our previous experience demonstrated

26 that a TAC with restricted coverage of common respiratory pathogens had a limited impact  
27 on clinical decision making in critically ill patients.<sup>18</sup> We therefore set out to develop and  
28 implement a multi-pathogen array that would have broad applicability for severe pneumonia .  
29

## 30 **Materials and Methods**

31

### 32 **Card development**

33 Organism selection was informed by review the literature concerning organisms found in  
34 severe pneumonia <sup>1,2,6,13,18,19</sup>. Details of organism selection and the card layout are shown in  
35 supplemental section (Supplemental Figure S1). The card covers 52 organisms (23 bacteria, 2  
36 mycobacteria, 6 atypical bacteria, 5 fungi and 16 viruses). The study was undertaken prior to  
37 the COVID-19 pandemic starting in 2020.

38

### 39 **Card validation**

#### 40 **Technical validation**

41 The card was initially validated against stored extracts, synthetic control plasmids and all  
42 available External Quality Assessment (EQA) panels from Quality Control for Molecular  
43 Diagnostics ([www.qcmd.org](http://www.qcmd.org)) (supplemental results).

44

#### 45 **Retrospective cohort validation**

46 A retrospective cohort validation was conducting using stored bronchoalveolar lavage (BAL)  
47 samples obtained during the twenty four centre VAPrapid trial of a biomarker for the  
48 diagnosis of ventilator-associated pneumonia.<sup>15</sup> VAPrapid centres used semi-quantitative  
49 microbiological culture as the reference standard.

50

51

#### 52 **Prospective evaluation**

##### 53 **Setting**

54 Patients were recruited from a 20-bedded teaching hospital Intensive Care Unit (ICU). The  
55 unit is a mixed general medical-surgical unit which supports organ and haematology-  
56 oncology services.

57

### 58 **Recruitment**

59 Between February 2018 and August 2019, prospectively identified patients were eligible for  
60 inclusion if they were receiving invasive mechanical ventilation, and if the treating intensive  
61 care specialist was performing diagnostic bronchoscopy for suspected pneumonia. Written  
62 consent was obtained from the patient or a proxy decision maker. The TAC laboratory team  
63 were routinely unavailable from Friday 5pm to Monday 8am, and also sporadically  
64 unavailable due to leave. Patients who were not included in the study because of a lack of  
65 TAC laboratory team availability, and those from the month prior and month following the  
66 study, formed the comparator group.

67

### 68 **Sampling procedure**

69 Bronchoscopy was undertaken in accordance with existing unit protocols (supplemental  
70 methods).

### 71 **TAC testing**

72 Nucleic acids were extracted from BAL prior to loading on the TAC. The TAC was run by a  
73 dedicated laboratory team who did not undertake the conventional PCR or cultures, with  
74 blinding also assured by the results of the TAC being obtained before those from  
75 conventional microbiology. Full details of the TAC process are included in the supplemental  
76 section.

77

78



79 **Conventional microbiological testing**

80 BAL samples were processed according to the UK Standards for Microbiology Investigations  
81 (SMI),<sup>20</sup> with the results of microbiological semi-quantitative culture and conventional PCR  
82 for respiratory viruses, herpesviridae and *Pneumocystis jirovecii* forming the reference  
83 standard for the TAC (supplemental methods). As an experimental assay, the results of the  
84 TAC were not included in the laboratory information system, blinding the assessors of the  
85 reference standard to the TAC results.

86

87 **Return of results to clinical team**

88 Following review by a consultant clinical scientist, results were returned to the ICU team.  
89 Clinical microbiology advice was available 24 hours/day, and patients underwent weekday  
90 daily combined ICU-Microbiology multi-disciplinary review in keeping with existing unit  
91 practice (weekend microbiology input was available on request). The study did not mandate  
92 any course of action by the treating clinical team. Conventional microbiology results were  
93 returned to clinicians via the electronic health record; however in practice these were returned  
94 after the TAC results.

95

96 **Outcome measures**

97 The co-primary outcome measures were sensitivity, using conventional microbiology as the  
98 reference standard and time to result compared to conventional microbial culture. Time to  
99 result for microbial culture was taken as time from completion of lavage to first organism  
100 identification, or confirmation of negative growth if no organisms were detected.

101

102 Secondary outcome measures were sensitivity compared to metagenomic microbial  
103 sequencing, time to result compared to conventional PCR, days alive and free of antibiotics

104 (antibiotic-free days, AFDs) in seven and twenty-eight days following lavage and change in  
105 antibiotic therapy in the seven days following lavage. Qualitative assessment of whether  
106 TAC results impacted on antimicrobial change was assessed by clinical notes review by a  
107 member of the study team who was not involved in the decision-making process (VW) .

108

### 109 **Statistical analysis**

110 The difference in median time to result for conventional culture and TAC was assessed by  
111 Wilcoxon's matched-pairs test. Where conventional PCR failed, or where the lab did not test  
112 for the organism, the corresponding tests from the TAC were removed from calculation of  
113 diagnostic performance. Indeterminate cultures ('mixed upper respiratory tract flora') were  
114 considered negative. A sensitivity analysis, coding failed conventional PCR and organisms  
115 not tested 'negative' was also undertaken. Comparisons of distribution of antibiotic free days  
116 between TAC and comparator groups was by Mann-Whitney U test, differences in  
117 proportions of escalation and de-escalation decisions were assessed by Chi<sup>2</sup> test. Analyses  
118 were conducted using Prism v9.1 (Graphpad Inc, La Jolla, CA).

119

120

### 121 **Study size**

122 A planned prospective study size of 100 patients evaluated by TAC was selected to balance  
123 cost against including sufficient numbers to be able to make a judgement on the card's  
124 clinical utility. As the co-primary endpoint was time to result in a real-world setting that had  
125 not been previously evaluated, we did not undertake a formal power calculation.

126

127

128

## 129 **Ethical and regulatory approvals and funding**

130 The prospective study was approved by the Leeds East Research Ethics Committee  
131 (17/YH/0286) Cambridge University Hospitals NHS Foundation Trust was the sponsor, and  
132 registered with clinicaltrials.gov (NCT03996330). The assessment of routinely collected data  
133 from the comparator group received a consent waiver and was conducted under a protocol  
134 approved by the institutional review board (A095506). VAPrapid<sup>15</sup> was approved by the  
135 England and Northern Ireland (13/LO/065) and Scotland (13/SS/0074) National Research  
136 Ethics Service committees and sponsored by Newcastle upon Tyne Hospitals NHS  
137 Foundation Trust.

138

## 139 **Results**

### 140 **Technical validation**

141 Following initial validation against stored DNA extracts and synthetic plasmids, all  
142 microorganisms from the Quality Control for Molecular Diagnostics 2018 Sepsis EQA Pilot  
143 Study were successfully detected (supplemental Table S1).

144

### 145 **Retrospective cohort validation**

146 The card was tested against the stored samples available from the VAPrapid study<sup>15</sup>. 128  
147 samples with semi-quantitative culture results were available for analysis. 57 organisms were  
148 grown at or above 10<sup>4</sup> colony forming units(CFU)/ml<sup>20,21</sup>, with 55 detected by TAC (Table  
149 1). The TAC detected a further 295 organisms, including 64 viruses and one atypical  
150 organism which the recruiting centres did not test for. Excluding tests for organisms not  
151 detectable by culture, 3425 tests on TAC were negative. Sensitivity was 97% (95% CI 88-  
152 100%) and specificity 94% (95% CI 93-95%) (Supplemental Table S2). Organisms detected  
153 by both TAC and culture had a median cycles to threshold (Ct) value on the TAC of 29 (IQR  
154 26-32 range 20-35) whilst those detected by TAC alone had a median Ct value of 33 (IQR  
155 30-35 range 20-40) (supplemental Figure S2).

156

### 157 **Prospective evaluation**

158 Between January 2018 and September 2019 166 ventilated patients were investigated for  
159 pneumonia by bronchoscopy, 95 were tested by TAC. Five patients were tested twice by  
160 TAC, having suffered a subsequent respiratory deterioration, in total 100 TACs were run. 71  
161 patients formed the comparator group (Figure 1). Although inclusion criteria were pragmatic  
162 and only required senior clinician suspicion of pneumonia, 92% of cases met full ECDC  
163 criteria for clinical pneumonia (Supplemental Figure S3). Of the eight cases not meeting full  
164 ECDC criteria, one lacked a formal radiological report of infiltrates, one had no clinical signs  
165 of pneumonia, five had no signs of systemic inflammation and one patient lacked both  
166 radiological and systemic inflammation. Table 2 shows participant characteristics of the study  
167 population and comparator group.

168

### 169 **Time to result**

170 The median difference in time to result between TAC and conventional culture was 51 hours  
171 (IQR 41-69 hours  $p < 0.0001$  by Wilcoxon matched pairs), the TAC also returned results more  
172 rapidly than conventional PCR in almost all cases (Supplemental Figure S4). The minimum  
173 TAC time to return was 4 hours, with median time to result 22 hours (IQR 7-24 hours), most  
174 of the delays arose from samples taken outside routine working hours, whilst additional  
175 delays with conventional PCR results largely reflect laboratory workflow and batching of  
176 samples.

177

178

179

### 180 **Comparison of organisms detected by TAC compared to conventional microbiology**

181 178 organisms were identified from 100 samples on the TAC (Table 3, Supplemental Table  
182 S3). Conventional microbiology detected 66 organisms, with 61 detected by TAC. 27  
183 patients had failure of internal control for one or more conventional PCR assays, covering 93  
184 organisms. There were no TAC internal control failures and none of the organisms covered  
185 by the failed assays were detected on TAC or sequencing (Table 3). Sensitivity and  
186 specificity were 92% (95% CI 83-98%) and 97% (95% CI 97-98%) respectively  
187 (Supplemental Table S4). Including failed and absent reference standards as ‘negative’ had  
188 minimal effect on diagnostic performance (Supplemental Table S5)

189

### 190 **Comparison by sequencing**

191 98 samples were available for sequencing. Metagenomic sequencing revealed 107 organisms,  
192 100 of which were also detected by TAC (Tables 3, S3).

193

194 Concerning the 10 organisms detected by conventional microbiology or sequencing but  
195 missed by TAC, one organism, that was positive by both culture and sequencing albeit in  
196 different patients, was *Citrobacter freundii*, for which we did not have a sequence on the  
197 card. A further five pathogens were detected by sequencing (*Staphylococcus aureus*,  
198 *Legionella* spp., and *Staphylococcus epidermidis*) or both culture and sequencing (two *E.*  
199 *faecium*). Although these five were detected by TAC, they did not pass the internal quality  
200 control standards required for reporting and were considered ‘negative’ results. The  
201 remaining three organisms, two rhinovirus by conventional PCR and one *Staphylococcus* spp.  
202 by sequencing, were not detected by TAC at all.

203 One case of *Aspergillus fumigatus* was detected on the TAC, and although no moulds were  
204 cultured, the lavage galactomannan antigen test was highly positive (5.92 optical density  
205 index (ODI), laboratory reference range <0.5 ODI).

206

## 207 **Quantitation**

208 Twenty-five organisms were grown on conventional culture at  $\geq 10^4$  CFU/ml, the  
209 conventional cut off for quantitative culture of lavage.<sup>20, 21</sup> The median cycles to threshold  
210 (Ct) for these organisms on the TAC was 27 (IQR 24-29, range 20-33). In contrast, culturable  
211 organisms detected on TAC but not on culture had a median Ct of 32 (IQR 30-34, range 22-  
212 38) (supplemental Figure S2) .

213

## 214 **Antibiotic prescribing**

215 Patients in the TAC and comparator cohorts had similar severity of illness, severity of  
216 respiratory failure and demographic features (Table 2). Patients managed with the TAC had a  
217 significantly different distribution of AFDs to the comparator group in the 7 days following  
218 bronchoscopy ( $p=0.02$  by Mann-Whitney U-test), with more AFDs in the TAC cohort. This  
219 difference did not retain significance over 28 days (Supplemental Figure S5). Overall 72  
220 (76%) of TAC patients had their antibiotics changed in the seven days following  
221 bronchoscopy, with a total of 116 changes made (Table 4). In the comparator group 50  
222 (70%) of patients experienced a total of 65 changes. Whilst 63% of decisions in the TAC  
223 group led to de-escalation, only 37% of decisions in the comparator group were de-escalation  
224 decisions (OR 2.9 (95% CI 1.5-5.5)  $p=0.008$  by Chi-squared). Decisions which were judged  
225 to be related to the TAC result were weighted further towards de-escalation (73% of all TAC-  
226 related changes, Table 4). 11 (30%) of escalations in the TAC group were judged to have  
227 been targeted escalations in response to TAC results. In a further six cases negative TAC  
228 results prompted investigation for alternative diagnoses.

229

230

231 **Discussion**

232 We demonstrate that a customised molecular diagnostic, designed to meet the needs of a  
233 specific clinical setting produced accurate results in a clinically important time-frame and  
234 was associated with an increase in antibiotic-free days relative to the comparator group in the  
235 week following investigation. Diagnostic performance was similar when assessed in stored  
236 samples from multiple centres, indicating a generalisable result.

237

238 Molecular diagnostic platforms for respiratory infection syndromes have, until recently,  
239 largely focussed on viral pathogens.<sup>16</sup> However, the need to optimise antimicrobial therapy  
240 whilst limiting the over-use of these drugs has led to repeated calls for bacterial-focussed  
241 diagnostics.<sup>16,22</sup> TACs have been previously reported for use in pneumonia.<sup>18,23, 24</sup> However,  
242 apart from our previous report<sup>18</sup> that demonstrated limited clinical impact due to restricted  
243 organism coverage, none of the other reports have included ventilated patients and were  
244 restricted to retrospective analysis of stored samples. Commercial multiple-pathogen arrays  
245 that include respiratory bacteria have recently become available. However, most of reports of  
246 their use in ventilated patients remain limited to describing diagnostic performance,  
247 reporting ‘potential’ to change antimicrobial therapy rather than impact on clinical  
248 practice<sup>3,25,26</sup>. Concerns have been raised about the risks of over-treatment from molecular  
249 diagnostics<sup>16,27,28</sup>, whilst conversely promising tests with the potential to change therapy have  
250 not always proven this in clinical practice<sup>15,18</sup>. These commercially available assays lack the  
251 broad coverage and customisability of the TAC, with consistent concerns raised around  
252 limited organism coverage adversely impacting treatment decisions.<sup>3,18,25,26</sup>

253

254 Although there is now widespread acceptance of the presence of a respiratory  
255 microbiome,<sup>29,30</sup> the lungs of ventilated patients present a challenge to highly sensitive

256 molecular diagnostics<sup>16</sup>. The proximal respiratory tract of ventilated patients becomes rapidly  
257 colonised with predominantly Gram negative organisms.<sup>31,32</sup> This can occur in the absence of  
258 infection, and there is a risk that highly sensitive techniques will detect colonising organisms,  
259 driving unintended increases in antimicrobial use.<sup>16</sup> The use of protected lower airway  
260 specimens, with growth  $\geq 10^4$  CFU/ml for BAL have been used to distinguish infection from  
261 colonisation.<sup>21,33</sup> We adapted this approach in this study, using the quasi-quantitative Ct  
262 value provided by RT-PCR and testing protected bronchoalveolar samples. Using the  
263 comparison of the Ct values of organisms detected by culture and those detected by TAC  
264 without culture, we suggest that a Ct threshold of 32 be used to identify infecting rather than  
265 colonising organism (supplemental Figures S2, S6).

266

267 One of the problems that has beset bacterial diagnostics studies has been the absence of a  
268 ‘gold standard’ against which the candidate can be assessed,<sup>16,22,34</sup> as conventional culture is  
269 imperfect. For this study we used a combination of conventional microbiology (culture and  
270 viral PCR) and metagenomic sequencing. 10 organisms identified by conventional  
271 microbiology or sequencing were not detected by the TAC. Overall the TAC detected more  
272 organisms than either culture or sequencing, reflecting the higher sensitivity of qPCR.  
273 However, without a perfect validation method we cannot be certain these were not ‘false  
274 positives’ and have counted them as such for the calculation of specificity. The sequencing  
275 and culture results give clinicians considerable confidence in the results provided.

276

277 The selection of organisms targeted on the card was crucial, and informed by our previous  
278 experience where omission of key organisms significantly limited the impact of a similar  
279 card.<sup>18</sup> Given the case mix of our unit, with a high proportion of immunosuppressed patients,  
280 we opted to include a number of low pathogenicity organisms, (i.e. coagulase-negative



281 *Staphylococci(CNS), Enterococci and Candida albicans*), as well as Herpesviridae, which  
282 we routinely tested for. The detection of these organisms can be challenging to interpret<sup>35</sup>,  
283 given that many critically ill patients have a degree of immunoparesis, even if not classically  
284 immunosuppressed,<sup>6,36</sup> their significance remains uncertain. As our laboratory routinely  
285 reported these organisms on conventional microbiology the clinical team were already  
286 confronted with this issue. The inclusion of CNS also aids with the interpretation of the  
287 detection of the *mecA* gene, which is commonly carried by these organisms, thus helping  
288 identify MRSA. The lack of CNS on commercial cards has been noted to impair  
289 interpretation of *mecA* in clinical samples<sup>25,37</sup>. However the ready customisability of the  
290 TAC would allow units to remove such organisms, as well as add other organisms of local  
291 significance as we have done subsequently during the COVID-19 pandemic<sup>38</sup>.

292

293 The use of a contemporaneous comparator cohort allowed for comparisons of antibiotic  
294 prescribing within the context of the implementation of the TAC and any heightened  
295 awareness of antimicrobial stewardship it may have engendered. Despite this, the comparator  
296 cohort saw a greater proportion of escalation decisions in the week following lavage, and had  
297 fewer antibiotic-free days. The lack of difference in AFDs at day 28 is unsurprising, as  
298 suspected pneumonia is only one of multiple drivers of antibiotic use. Although the  
299 comparator and TAC groups had similar characteristics, our observational design means that  
300 we cannot be certain that unmeasured confounders did not contribute to the effects seen.

301

302 This study established a molecular diagnostic test to meet the needs of a particular intensive  
303 care unit, and implemented it in the context of a well-established antimicrobial stewardship  
304 program. Although the demonstration of similar performance on stored samples from  
305 multiple centres is reassuring, the impact on antimicrobial stewardship is likely to be context-

306 dependent. Replication in additional settings with distinct approaches to stewardship is  
307 required before we can be certain of its external generalisability, whilst evaluation in a  
308 randomised, controlled trial would help reduce any bias that may have arisen from our  
309 observational study design. We believe this approach represents a promising new approach to  
310 the management of severe pneumonia.

311

## 312 **References**

- 313 1. Cilloniz C, Ewig S, Polverino E, et al. Microbial aetiology of community-  
314 acquired pneumonia and its relation to severity. *Thorax*. 2011;66(4):340-346.
- 315 2. Vincent J-L, Sakr Y, Singer M, et al. Prevalence and Outcomes of Infection  
316 Among Patients in Intensive Care Units in 2017. *JAMA*. 2020;323(15):1478–10.
- 317 3. Gadsby NJ, McHugh MP, Forbes C, et al. Comparison of Unyvero P55  
318 Pneumonia Cartridge, in-house PCR and culture for the identification of respiratory  
319 pathogens and antibiotic resistance in bronchoalveolar lavage fluids in the critical care  
320 setting. *Eur J Clin Microbiol Infect Dis*. 2019;38(6):1171–1178.
- 321 4. Arulkumaran N, Routledge M, Schlebusch S, Lipman J, Morris AC.  
322 Antimicrobial-associated harm in critical care: a narrative review. *Intensive Care Med*.  
323 January 2020:1-11.
- 324 5. Iregui M, Ward S, Sherman G, Fraser VJ, Kollef MH. Clinical Importance of  
325 Delays in the Initiation of Appropriate Antibiotic Treatment for Ventilator-Associated  
326 Pneumonia. *Chest* 2002;122(1):262-268.
- 327 6. Morris AC. Management of pneumonia in intensive care. *J Emerg Crit Care*  
328 *Med*. 2018;2:101-101.
- 329 7. Rangel-Frausto MS, Pittet D, Costigan M, Hwang T, Davis CS, Wenzel RP.  
330 The Natural History of the Systemic Inflammatory Response Syndrome (SIRS).  
331 *JAMA*. 1995;273(2):117–5.
- 332 8. Lichtenstein D, Goldstein I, Mourgeon E, Cluzel P, Grenier P, Rouby J-J.  
333 Comparative diagnostic performances of auscultation, chest radiography, and lung  
334 ultrasonography in acute respiratory distress syndrome. *Anesthesiology*.  
335 2004;100(1):9-15.
- 336 9. Meduri GU, Mauldin GL, Wunderink RG, et al. Causes of fever and  
337 pulmonary densities in patients with clinical manifestations of ventilator-associated  
338 pneumonia. *Chest*. 1994;106(1):221-235.
- 339 10. Conway Morris A, Kefala K, Wilkinson TS, et al. Diagnostic importance of  
340 pulmonary interleukin-1{beta} and interleukin-8 in ventilator-associated pneumonia.  
341 *Thorax*. 2010;65(3):201-207.

- 342 11. Pova P, Coelho L, Almeida E, et al. C-reactive protein as a marker of  
343 ventilator-associated pneumonia resolution: a pilot study. *Eur Resp J*. 2005;25(5):804-  
344 812.
- 345 12. Pfister R, Kochanek M, Leygeber T, et al. Procalcitonin for diagnosis of  
346 bacterial pneumonia in critically ill patients during 2009 H1N1 influenza pandemic: a  
347 prospective cohort study, systematic review and individual patient data meta-analysis.  
348 *Critical Care*. 2014;18(2):1-11.
- 349 13. Hellyer TP, Morris AC, Mcauley DF, et al. Diagnostic accuracy of pulmonary  
350 host inflammatory mediators in the exclusion of ventilator-acquired pneumonia.  
351 *Thorax*. 2015;70(1):41-47.
- 352 14. Huang DT, Yealy DM, Filbin MR, et al. Procalcitonin-Guided Use of  
353 Antibiotics for Lower Respiratory Tract Infection. *N Engl J Med*. 2018;379(3):236-  
354 249.
- 355 15. Hellyer TP, McAuley DF, Walsh TS, et al. Biomarker-guided antibiotic  
356 stewardship in suspected ventilator-associated pneumonia (VAPrapid2): a randomised  
357 controlled trial and process evaluation. *Lancet Resp Med*. December 2019:1-10.
- 358 16. Hanson KE, Azar MM, Banerjee R, et al. Molecular Testing for Acute  
359 Respiratory Tract Infections: Clinical and Diagnostic Recommendations From the  
360 IDSA's Diagnostics Committee. *Clin Infect Dis*. 2020;5:401-408.
- 361 17. Steensels D, Reynders M, Descheemaeker P, et al. Clinical evaluation of a  
362 multi-parameter customized respiratory TaqMan® array card compared to  
363 conventional methods in immunocompromised patients. *J Clin Virol*. 2015;72:36-41.
- 364 18. Jones N, Conway Morris A, Curran MD et al. Evaluating the use of a 22-  
365 pathogen TaqMan array card for rapid diagnosis of respiratory pathogens in Intensive  
366 Care. *J Med Microbiol*. 2020; 69: 971-978.
- 367 19. Gadsby NJ, Russell CD, McHugh MP, et al. Comprehensive Molecular  
368 Testing for Respiratory Pathogens in Community-Acquired Pneumonia. *Clin Infect*  
369 *Dis*. 2016;62(7):817-823.
- 370 20. Public Health England. Investigation of bronchoalveolar lavage, sputum and  
371 associated specimens UK SMI B 57 issue 3.5 (May 2019) (available from  
372 [https://www.gov.uk/government/publications/smi-b-57-investigation-of-](https://www.gov.uk/government/publications/smi-b-57-investigation-of-bronchoalveolar-lavage-sputum-and-associated-specimens)  
373 [bronchoalveolar-lavage-sputum-and-associated-specimens](https://www.gov.uk/government/publications/smi-b-57-investigation-of-bronchoalveolar-lavage-sputum-and-associated-specimens)) accessed 29/4/2021
- 374 21. Plachouras D, Lepape A, Suetens C. ECDC definitions and methods for the  
375 surveillance of healthcare-associated infections in intensive care units. *Intensive Care*  
376 *Med*. October 2018:1-3.
- 377 22. The Lancet Respiratory Medicine. Pneumonia research: time to fill in the  
378 gaps. *Lancet Resp Med*. 2019;7(12):993.
- 379 23. Wolff BJ, Bramley AM, Thurman KA, et al. Improved Detection of  
380 Respiratory Pathogens by Use of High-Quality Sputum with TaqMan Array Card  
381 Technology. Onderdonk AB, ed. *J Clin Microbiol*. 2017;55(1):110-121.

- 382 24 Hercik C, Cosmas L, Mogeni OD, et al. A diagnostic and epidemiologic  
383 investigation of acute febrile illness (AFI) in Kilombero, Tanzania. Schildgen O, ed.  
384 *PLoS ONE*. 2017;12(12):e0189712-e0189720.
- 385 25 Peiffer-Smadja N, Bouadma L, Mathy V, et al. Performance and impact of a  
386 multiplex PCR in ICU patients with ventilator-associated pneumonia or ventilated  
387 hospital-acquired pneumonia. *Crit Care*. 2020;24:366  
388 .
- 389 26 Monard C, Pehlivan J, Auger G, et al. Multicenter evaluation of a syndromic  
390 rapid multiplex PCR test for early adaptation of antimicrobial therapy in adult patients  
391 with pneumonia. *Crit Care*. 2020;24:434  
392
- 393 27. Houben RMGJ, Lalli M, Kranzer K, Menzies NA, Schumacher SG, Dowdy  
394 DW. What if They Don't Have Tuberculosis? The Consequences and Trade-offs  
395 Involved in False-positive Diagnoses of Tuberculosis. *Clin Infect Dis*. 2019;68:150-  
396 156  
397
- 398 28. Weinrib DA, Capraro GA. The Uncertain Clinical Benefit of the T2Bacteria  
399 Panel. *Ann Intern Med*. 2019;170:888-889  
400
- 401 29. Nolan TJ, Gadsby NJ, Hellyer TP, et al. Low-pathogenicity *Mycoplasma* spp.  
402 alter human monocyte and macrophage function and are highly prevalent among  
403 patients with ventilator-acquired pneumonia. *Thorax*. 2016;71(7):594-600.
- 404 30. Zakharkina T, Martin-Loeches I, Matamoros S, et al. The dynamics of the  
405 pulmonary microbiome during mechanical ventilation in the intensive care unit and the  
406 association with occurrence of pneumonia. *Thorax*. 2017;72(9):803-810.
- 407 31. Ewig S, Torres A, El-Ebiary M, et al. Bacterial colonization patterns in  
408 mechanically ventilated patients with traumatic and medical head injury. Incidence,  
409 risk factors, and association with ventilator-associated pneumonia. *Am J Respir Crit  
410 Care Med*. 1999;159(1):188-198.
- 411 32. Roquilly A, Torres A, Villadangos JA, et al. Pathophysiological role of  
412 respiratory dysbiosis in hospital-acquired pneumonia. *Lancet Resp Med*.  
413 2019;7(8):710-720.
- 414 33. Morris AC, Kefala K, Simpson AJ, et al. Evaluation of the effect of diagnostic  
415 methodology on the reported incidence of ventilator-associated pneumonia. *Thorax*.  
416 2009;64(6):516-522.
- 417 34. Bhat N, O'Brien KL, Karron RA, Driscoll AJ, Murdoch DR, the Pneumonia  
418 Methods Working Group. Use and Evaluation of Molecular Diagnostics for  
419 Pneumonia Etiology Studies. *Clin Infect Dis*. 2012;54(suppl 2):S153-S158.
- 420 35. Hagel S, Scherag A, Schuierer L, et al. Effect of antiviral therapy on the  
421 outcomes of mechanically ventilated patients with herpes simplex virus detected in the  
422 respiratory tract: a systematic review and meta-analysis. *Crit Care*. 2020;24(1):584-  
423 10.

- 424 36. Morris AC, Datta D, Shankar-Hari M, et al. Cell-surface signatures of immune  
425 dysfunction risk-stratify critically ill patients: INFECT study. *Intensive Care Med.*  
426 2018;44(5):627-635.
- 427 37. Webber DM, Wallace MA, Burnham CA, Anderson NW. Evaluation of the  
428 BioFire FilmArray Pneumonia Panel for Detection of Viral and Bacterial Pathogens in  
429 Lower Respiratory Tract Specimens in the Setting of a Tertiary Care Academic  
430 Medical Center. *J Clin Microbiol.* 2020;58:e00343-20  
431
- 432 38. Maes M, Higginson E, Pereira-Dias J, et al. Ventilator-associated pneumonia  
433 in critically ill patients with COVID-19. *Crit Care.* 2021;25(1):25–11.
- 434
- 435
- 436

437 **Tables**  
 438  
 439

| Organism detected                                            | Frequency of growth ( $\geq 10^4$ CFU/ml) on conventional culture | Frequency by TAC (numbers detected at Ct $\leq$ 32 shown in brackets) |
|--------------------------------------------------------------|-------------------------------------------------------------------|-----------------------------------------------------------------------|
| <b>Gram negative</b>                                         |                                                                   |                                                                       |
| <i>Acinetobacter baumannii</i> complex                       | 2                                                                 | 4 (3)                                                                 |
| <i>Enterobacter aerogenes</i>                                | 1                                                                 | 0*                                                                    |
| <i>Enterobacter cloacae</i>                                  | 2                                                                 | 7 (5)                                                                 |
| <i>Enterococcus faecalis</i>                                 | 0                                                                 | 2 (1)                                                                 |
| <i>Enterococcus faecium</i>                                  | 2                                                                 | 15 (9)                                                                |
| <i>Escherichia coli</i>                                      | 6                                                                 | 44 (16)                                                               |
| <i>Enterobacteriaceae</i> (not further specified)            | 0                                                                 | 7 (3)                                                                 |
| <i>Haemophilus influenzae</i>                                | 3                                                                 | 23 (19)                                                               |
| <i>Haemophilus haemolyticus</i>                              | 1                                                                 | 0*                                                                    |
| <i>Klebsiella pneumoniae</i>                                 | 2                                                                 | 13 (6)                                                                |
| <i>Legionella</i> spp. (non-pneumophilia)                    | 0                                                                 | 1 (1)                                                                 |
| <i>Moraxella catharralis</i>                                 | 1                                                                 | 5 (4)                                                                 |
| <i>Morganella morganii</i>                                   | 0                                                                 | 1 (1)                                                                 |
| <i>Mycoplasma pneumoniae</i>                                 | 0                                                                 | 1 (1)                                                                 |
| <i>Neisseria meningitidis</i>                                | 0                                                                 | 1 (1)                                                                 |
| <i>Proteus</i> spp. <sup>#</sup>                             | 2                                                                 | 7 (5)                                                                 |
| <i>Pseudomonas aeruginosa</i>                                | 5                                                                 | 10 (9)                                                                |
| <i>Serratia marcescens</i>                                   | 1                                                                 | 5 (3)                                                                 |
| <b>Gram positive</b>                                         |                                                                   |                                                                       |
| <i>Staphylococcus aureus</i>                                 | 21                                                                | 32 (28)                                                               |
| <i>Staphylococcus epidermidis</i>                            | 0                                                                 | 12 (3)                                                                |
| Other coagulase negative <i>Staphylococcus</i>               | 0                                                                 | 9 (1)                                                                 |
| <i>Stenotrophomonas maltophilia</i>                          | 2                                                                 | 11 (5)                                                                |
| <i>Streptococcus pneumoniae</i>                              | 0                                                                 | 15 (10)                                                               |
| <i>Streptococcus pyogenes</i>                                | 0                                                                 | 1 (1)                                                                 |
| <i>Streptococcus</i> spp. (not further specified)            | 0                                                                 | 37 (25)                                                               |
| <b>Fungi</b>                                                 |                                                                   |                                                                       |
| <i>Aspergillus fumigatus</i> .                               | 0                                                                 | 1 (1)                                                                 |
| <i>Candida albicans</i>                                      | 4                                                                 | 17 (7)                                                                |
| <i>Candida</i> spp.                                          | 2                                                                 | 5 (3)                                                                 |
| <b>Viruses</b> (not tested for by conventional microbiology) |                                                                   |                                                                       |
| Coronavirus OC43                                             |                                                                   | 1 (1)                                                                 |
| Cytomegalovirus                                              |                                                                   | 6 (1)                                                                 |
| Epstein-Barr Virus                                           |                                                                   | 15 (3)                                                                |
| Herpes simplex virus                                         |                                                                   | 34 (26)                                                               |
| Influenza A                                                  |                                                                   | 3 (3)                                                                 |
| Parainfluenza virus                                          |                                                                   | 1 (1)                                                                 |
| Rhinovirus                                                   |                                                                   | 4 (4)                                                                 |

440  
 441 **Table 1: culture of microorganisms from 128 stored samples from the VAPrapid clinical**  
 442 **trial<sup>15</sup> and results from the TAC.** CFU- colony forming units/ml, Ct -cycles to crossing  
 443 threshold.  
 444 \*not on card  
 445 <sup>#</sup> culture reported as *Proteus mirabilis*, on TAC reported as genus-level *Proteus* spp.  
 446  
 447  
 448  
 449

450  
451  
452

| <b>Parameter</b>                                     | <b>TAC patients<br/>(95 patients)</b> | <b>Comparator group<br/>(71 patients)</b> |
|------------------------------------------------------|---------------------------------------|-------------------------------------------|
| Median age (range)                                   | 60 (21-86)                            | 62 (18-83)                                |
| n (%) female                                         | 41 (43 %)                             | 27 (38 %)                                 |
| Median (IQR) functional comorbidity index            | 1 (2)                                 | 1 (2)                                     |
| n (%) with community-acquired pneumonia              | 34 (36%)                              | 20 (28%)                                  |
| n (%) hospital-acquired pneumonia                    | 61 (64%)                              | 51 (72%)                                  |
| of HAP n (%) ventilator-associated                   | 24 (39%)                              | 27 (52%)                                  |
| Median (IQR) APACHE II score on admission            | 16 (10)                               | 16 (9)                                    |
| % receiving antibiotics at time of lavage            | 82%                                   | 96%                                       |
| Median (IQR) FiO <sub>2</sub> prior to bronchoscopy  | 0.5 (0.25)                            | 0.5 (0.30)                                |
| Median (IQR) white cell count (x10 <sup>9</sup> /L)  | 10.5 (12.4)                           | 10.7 (9.5)                                |
| Median (IQR) neutrophil count (x10 <sup>9</sup> /L)  | 8.6 (11.5)                            | 8.8 (8.63)                                |
| Median (IQR) C-reactive protein concentration (mg/L) | 198 (153)                             | 146 (154)                                 |
| 28-day mortality n (%)                               | 30 (32%)                              | 21 (30%)                                  |

453  
454  
455  
456  
457  
458  
459

**Table 2: Baseline characteristics of study population.** APACHE II, acute physiology and chronic health evaluation II, FiO<sub>2</sub>, fraction of inspired oxygen.

| Organism detected                                        | Frequency (by conventional microbiology) | Frequency (by TAC) | Frequency (by sequencing) |
|----------------------------------------------------------|------------------------------------------|--------------------|---------------------------|
| <b>Bacteria</b>                                          |                                          |                    |                           |
| <i>Citrobacter freundii</i>                              | 1*                                       | 0                  | 1*                        |
| <i>Enterobacter cloacae</i>                              | 2                                        | 8                  | 3                         |
| <i>Enterococcus faecalis</i>                             | 0                                        | 3                  | 0                         |
| <i>Enterococcus faecium</i>                              | 3                                        | 7                  | 7                         |
| <i>Escherichia coli</i>                                  | 6                                        | 14                 | 6                         |
| <i>Klebsiella pneumoniae</i>                             | 3                                        | 5                  | 3                         |
| <i>Enterobacteriaceae</i> (not further specified)        | 0                                        | 1                  | 2                         |
| <i>Haemophilus influenzae</i>                            | 0                                        | 3                  | 2                         |
| <i>Legionella pneumophila</i>                            | 1**                                      | 1                  | 1                         |
| <i>Legionella</i> spp. (non-pneumophila)                 | 0                                        | 2                  | 2                         |
| <i>Moraxella catharralis</i>                             | 0                                        | 1                  | 0                         |
| <i>Mycoplasma pneumoniae</i>                             | 0                                        | 1                  | 1                         |
| <i>Proteus</i> spp.                                      | 0                                        | 2                  | 0                         |
| <i>Pseudomonas aeruginosa</i>                            | 2                                        | 5                  | 4                         |
| <i>Serratia marcescens</i>                               | 1                                        | 3                  | 0                         |
| <i>Staphylococcus aureus</i>                             | 2                                        | 8                  | 8                         |
| <i>Staphylococcus epidermidis</i>                        | 0                                        | 9                  | 2                         |
| Other coagulase negative <i>Staphylococcus</i>           | 0                                        | 1                  | 2                         |
| Other <i>Staphylococcus</i> spp. (not further specified) | 0                                        | 0                  | 1                         |
| <i>Stenotrophomonas maltophilia</i>                      | 2                                        | 4                  | 2                         |
| <i>Streptococcus pneumoniae</i>                          | 1                                        | 9                  | 6                         |
| <i>Streptococcus pyogenes</i>                            | 0                                        | 1                  | 0                         |
| <i>Streptococcus</i> spp. (not further specified)        | 0                                        | 23                 | 10                        |
| Mixed upper respiratory tract flora                      | 1                                        | N/A                | N/A                       |
| <b>Fungi</b>                                             |                                          |                    |                           |
| <i>Aspergillus</i> spp.                                  | 0***                                     | 1                  | 0                         |
| <i>Candida albicans</i>                                  | 1                                        | 12                 | 10                        |
| <i>Candida</i> spp.                                      | 0                                        | 1                  | 1                         |
| <i>Pneumocystis jirovecii</i>                            | 4                                        | 4                  | 3                         |
| <b>Viruses</b>                                           |                                          |                    |                           |
| Coronavirus <sup>#</sup>                                 | 0                                        | 3                  | 1                         |
| Cytomegalovirus                                          | 5                                        | 7                  | 4                         |
| Epstein-Barr Virus                                       | 1                                        | 6                  | 1                         |
| Herpes simplex virus                                     | 7                                        | 11                 | 7                         |
| Human metapneumovirus                                    | 1                                        | 1                  | 1                         |
| Influenza A                                              | 7                                        | 7                  | 5                         |
| Influenza B                                              | 3                                        | 3                  | 2                         |
| Parainfluenza virus                                      | 4                                        | 4                  | 4                         |
| Rhinovirus                                               | 8                                        | 8                  | 7                         |

460

461

462

463

464

465

466

467

468

469

470

471

472

**Table 3: Summary of organisms detected by conventional microbiological testing (left hand column), by TAC (middle column), and by microbial sequencing (right hand column).** \* One hit not found in same patient; not on card. \*\*Legionella urinary antigen test positive. \*\*\* Positive BAL galactomannan enzyme immunoassay (>0.5 units) with CT consistent with fungal pneumonia and known risk factors but fungal cultures were not positive. # refers to human coronavirade OC43, 229E and NL63, no tests were undertaken for SARS-CoV2 and final testing occurred in August 2019.



| Antibiotic change    | Details of change                                                                             | TAC cohort  |               | Comparator cohort |
|----------------------|-----------------------------------------------------------------------------------------------|-------------|---------------|-------------------|
|                      |                                                                                               | TAC-related | TAC-unrelated |                   |
| <b>De-escalation</b> | Stopping macrolides                                                                           | 14          | 3             | 6                 |
|                      | Stopping carbapenem or anti-pseudomonal penicillin                                            | 10          | 14            | 10                |
|                      | Narrowing from carbapenem/antipseudomonal penicillin to narrower spectrum penicillin          | 7           | 0             | 1                 |
|                      | Stopping cotrimoxazole                                                                        | 6*          | 1             | 0                 |
|                      | Stopping antivirals                                                                           | 3           | 0             | 0                 |
|                      | Stopping aminoglycosides                                                                      | 2           | 3             | 0                 |
|                      | Stopping other agents                                                                         | 6           | 4             | 7                 |
| <b>Escalation</b>    | Start antivirals                                                                              | 7           | 0             | 1                 |
|                      | Start or broaden antifungals cover                                                            | 3           | 7**           | 6                 |
|                      | Broadened Gram negative cover (add anti-pseudomonal penicillin, aminoglycoside or carbapenem) | 3           | 16            | 28                |
|                      | Add glycopeptide                                                                              | 4           | 1             | 5                 |
|                      | Add cover for atypical organism                                                               | 1           | 1             | 1                 |

473  
474  
475  
476  
477  
478  
479  
480

**Table 4: Detail of changes in antibiotic therapy in the seven days following lavage in the TAC and comparator cohorts.** Changes judged to be TAC-related are shown in the left-hand sub-column for the TAC group. Several patients had more than one change in antibiotic therapy. \*includes two de-escalations to prophylactic dose, \*\* includes two escalations from prophylactic to therapeutic dose.

481 **Figure legends**

482

483

484

485 **Figure 1: Study flow diagram**

486 \*included in comparator group as TAC laboratory team not available to process samples

487

488

489

490

491 **Figure 2: Distribution of days alive and free of antibiotics in the seven days following**

492 **bronchoscopy and lavage in the TAC and comparator cohorts.** Following first lavage

493 only for patients who had more than one BAL during ICU admission. Numbers in each

494 category and percentage shown below graph, p value by Mann-Whitney U test.

495

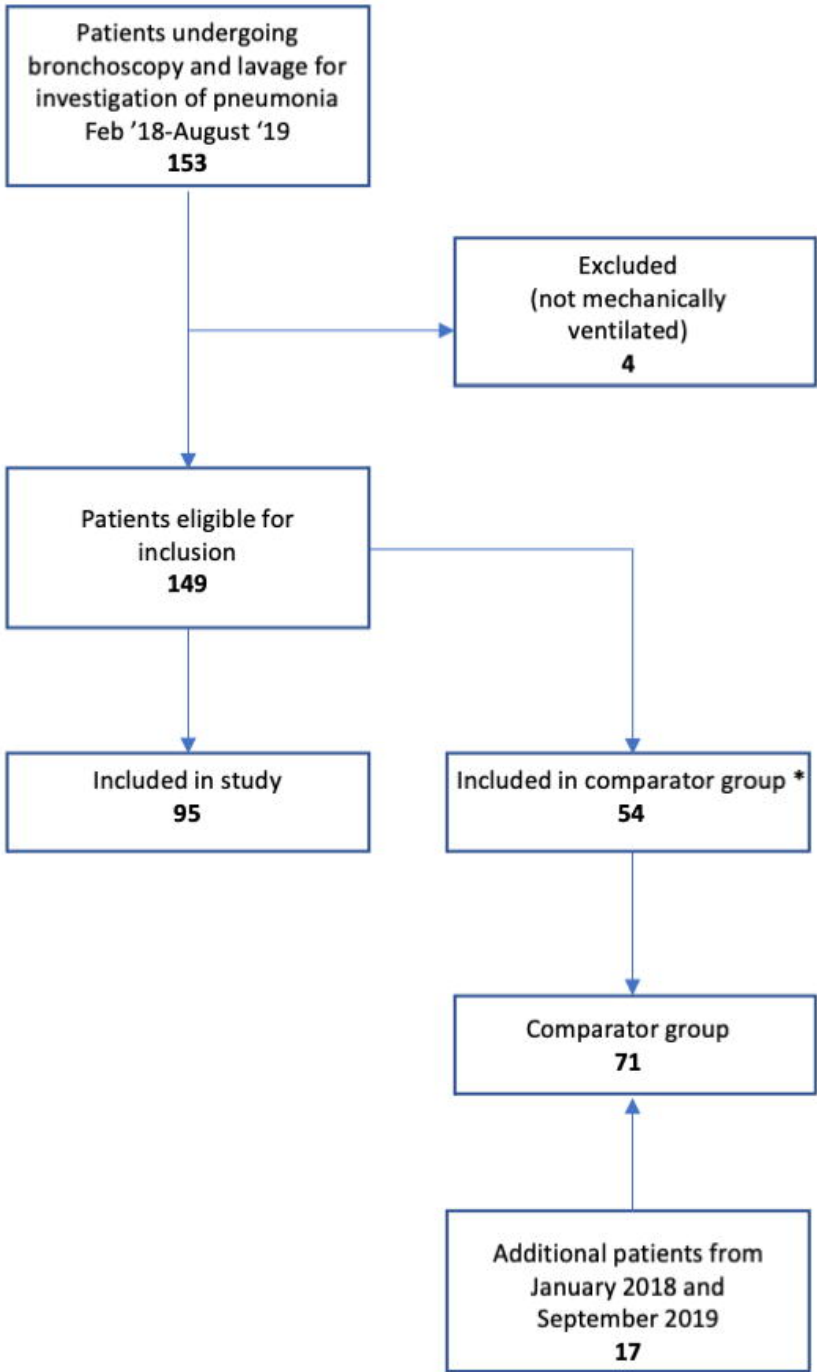

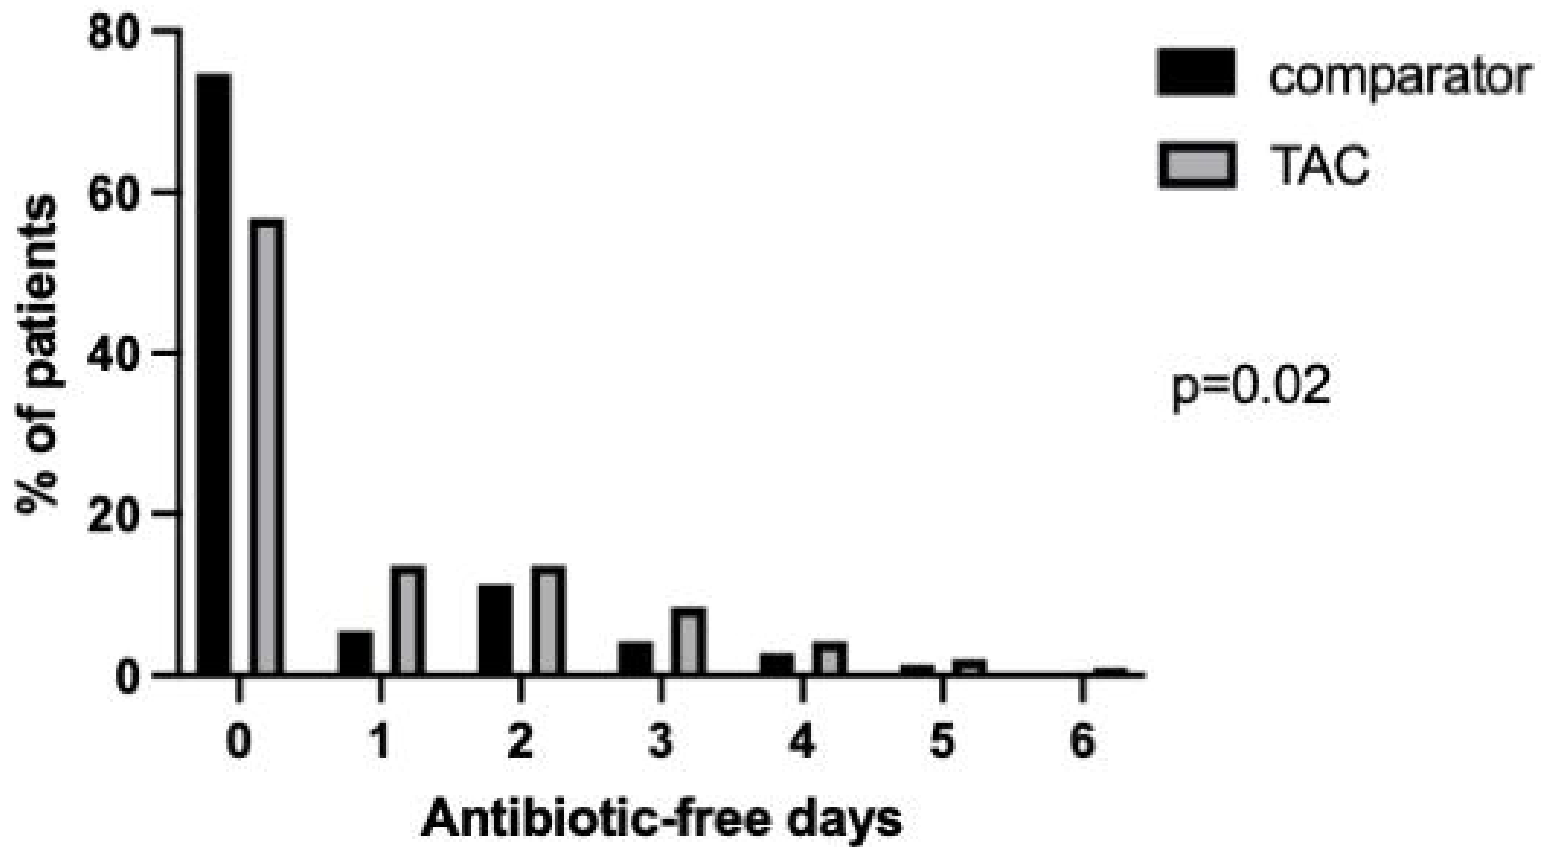

|          |    |    |    |   |   |   |   |
|----------|----|----|----|---|---|---|---|
| Comp (n) | 53 | 4  | 8  | 3 | 2 | 1 | 0 |
| TAC (n)  | 54 | 13 | 13 | 8 | 4 | 2 | 1 |
