# Supplementary material for: Development and implementation of a customised rapid syndromic diagnostic test for severe pneumonia
Source: bioRxiv or medRxiv preprint supplement (doi:10.1101/2020.06.02.20118489), 2021-06-11

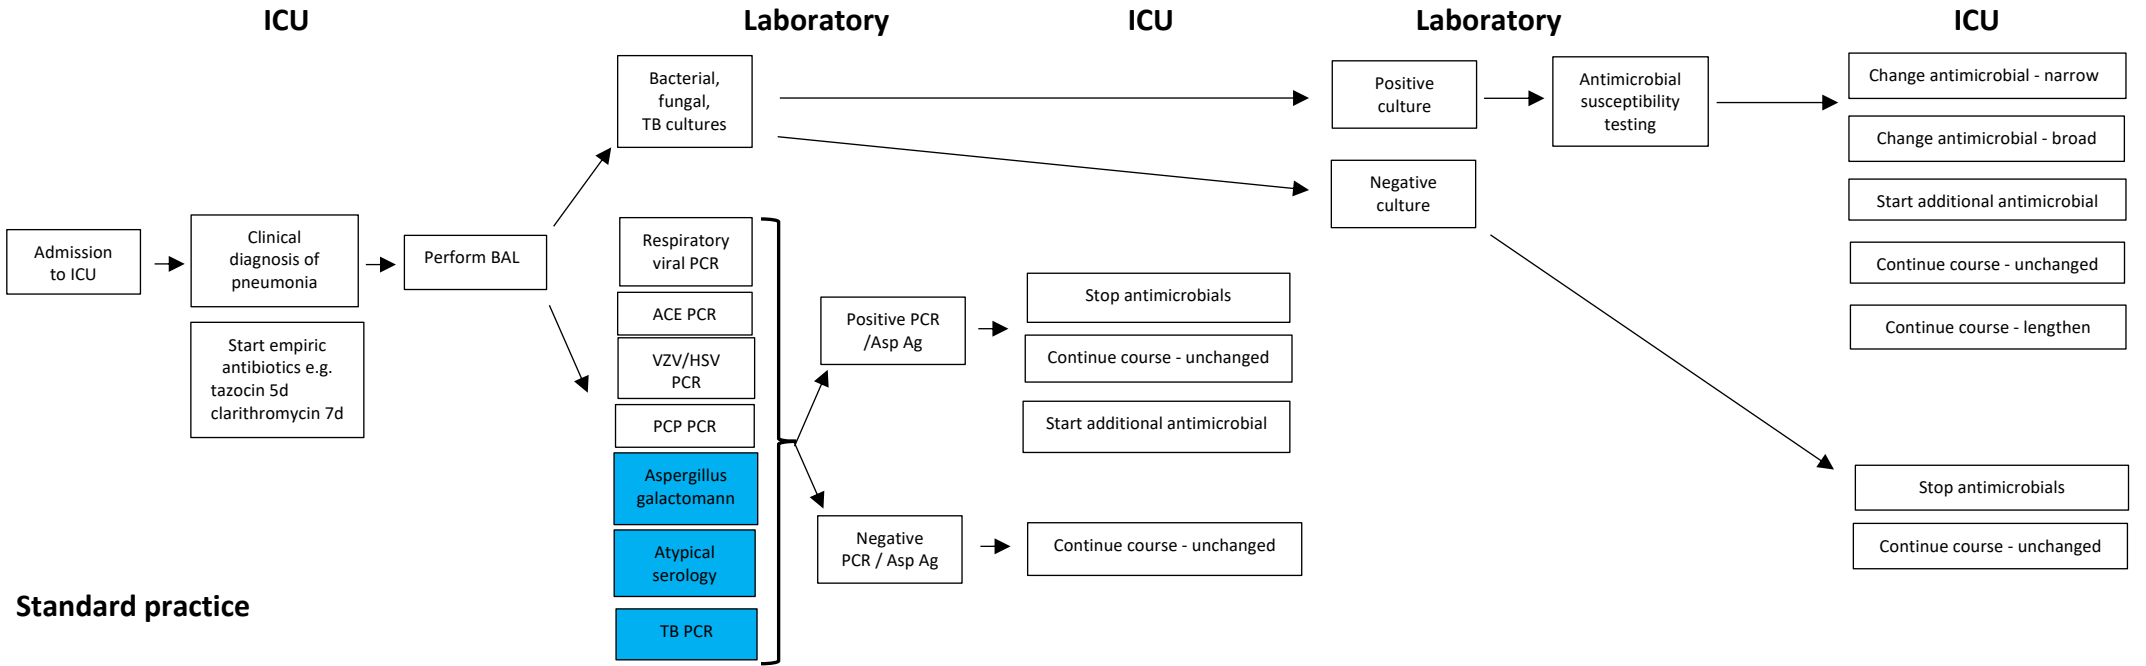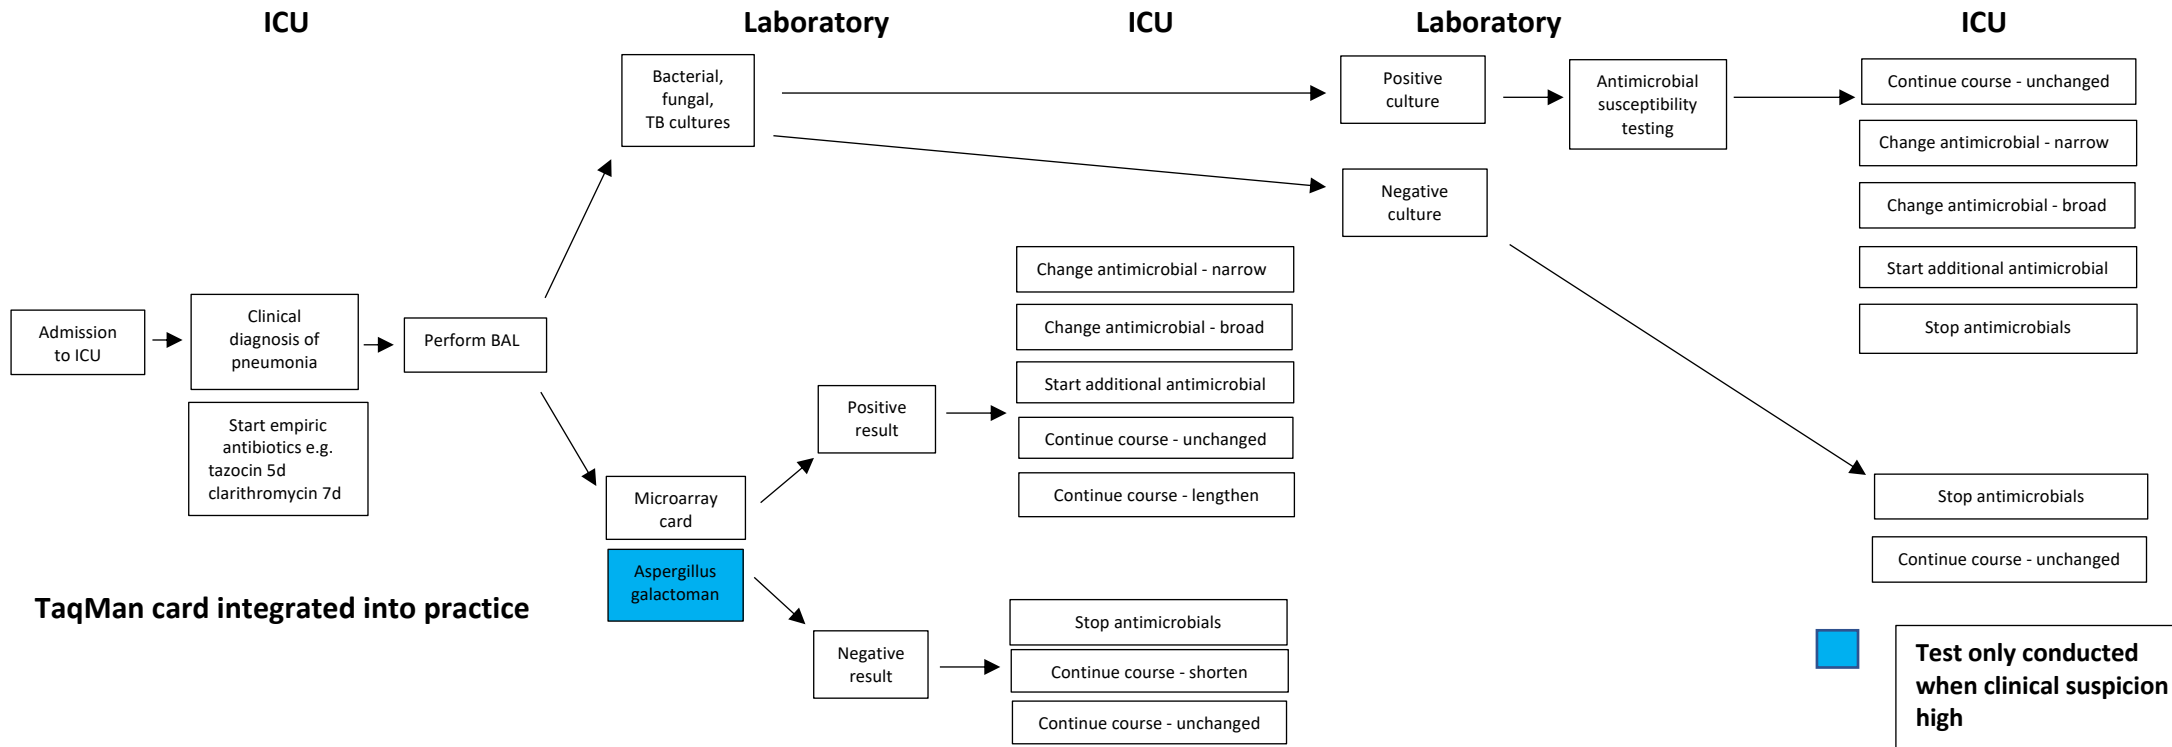

Supplement: Supplementary file [file 2020.06.02.20118489-3.pdf]
